# Supplementary material for: Synthesis of N-heterocyclic carbene gold(I) complexes
Source: Springer Nature journal article supplement (doi:10.1038/s41596-020-00461-6), 2021-01-27

f19\_txo CD2Cl2 {D:\vd\sp\spn} bruker 1

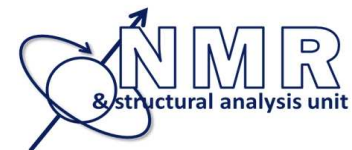

Current Data Parameters  
NAME nitz  
EXPNO 2179  
PROCNO 1

F2 - Acquisition Parameters  
Date\_ 20200904  
Time 11.38  
INSTRUM spect  
PROBHD 5 mm PATXO 19F  
PULPROG zg  
TD 65536  
SOLVENT CD2Cl2  
NS 32  
DS 4  
SWH 163043.484 Hz  
FIDRES 2.487846 Hz  
AQ 0.2009771 sec  
RG 63.79  
DW 3.067 usec  
DE 6.50 usec  
TE 298.0 K  
D1 1.00000000 sec  
TD0 1

===== CHANNEL f1 =====  
SF01 470.5570826 MHz  
NUC1 19F  
P1 20.47 usec  
PLW1 10.00000000 W

F2 - Processing parameters  
SI 65536  
SF 470.5923770 MHz  
WDW EM  
SSB 0  
LB 0.50 Hz  
GB 0  
PC 1.00

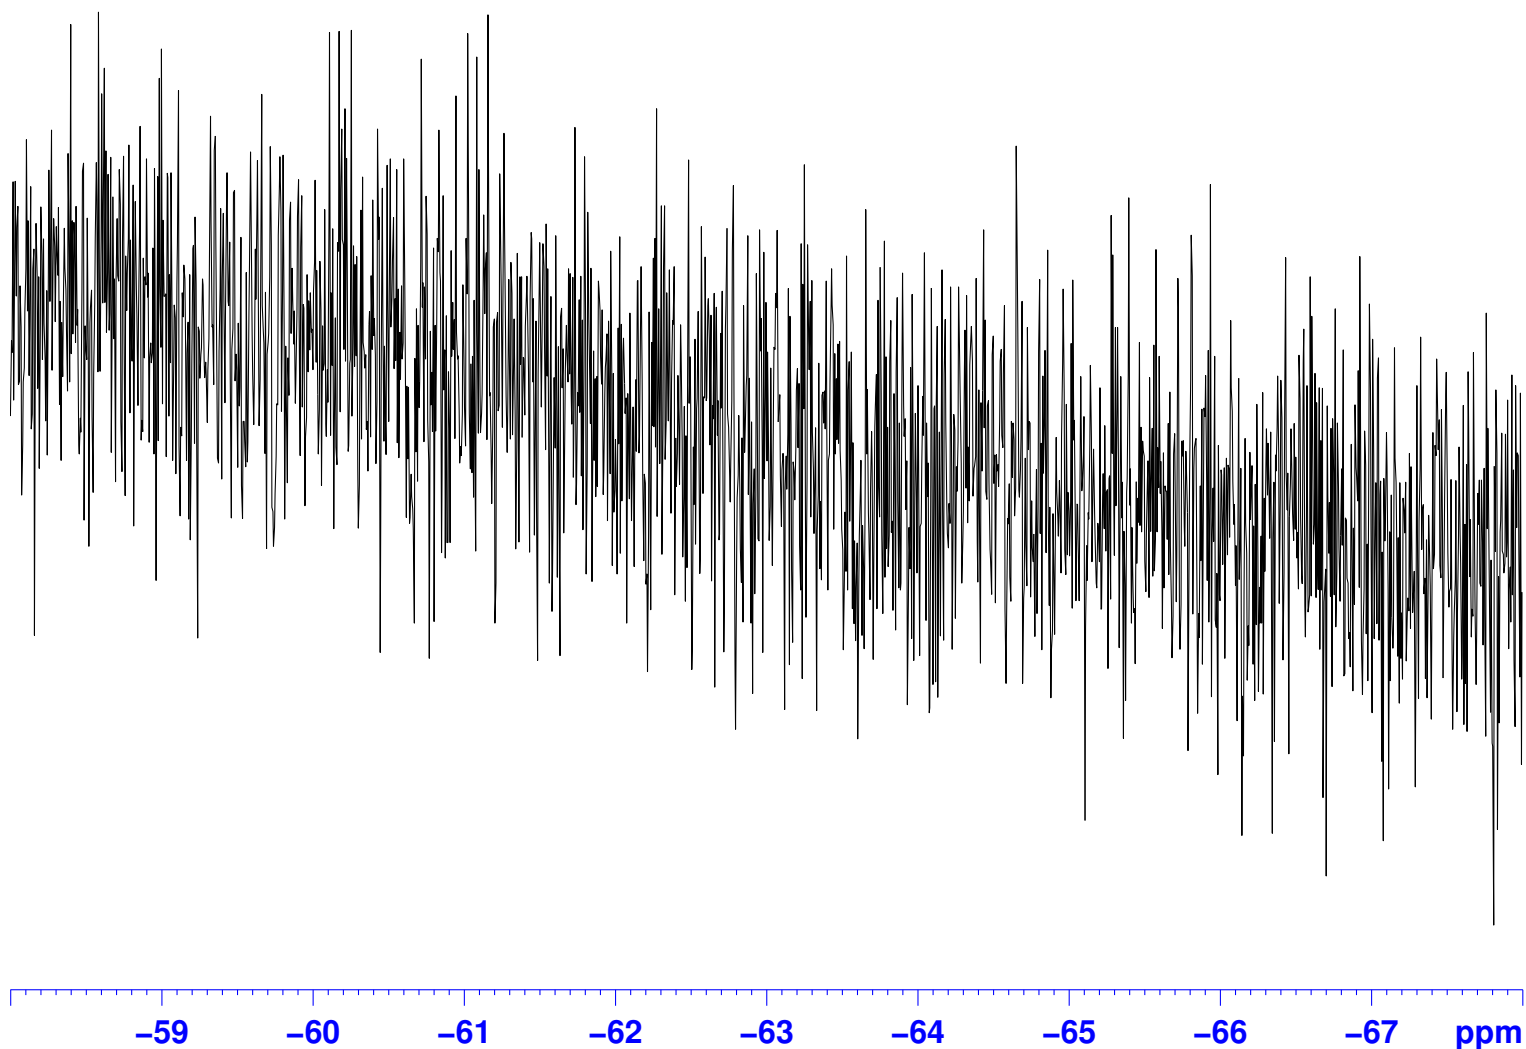

Supplement: MOESM2 [file 41596_2020_461_MOESM2_ESM15.zip]
