# Supplementary material for: Synthesis of N-heterocyclic carbene gold(I) complexes
Source: Springer Nature journal article supplement (doi:10.1038/s41596-020-00461-6), 2021-01-27
Supplement: MOESM2 [file 41596_2020_461_MOESM2_ESM15.zip]

apt\_icon CD2Cl2 {D:\vd\sp\spn400} ope400 59

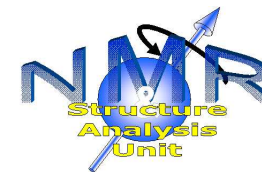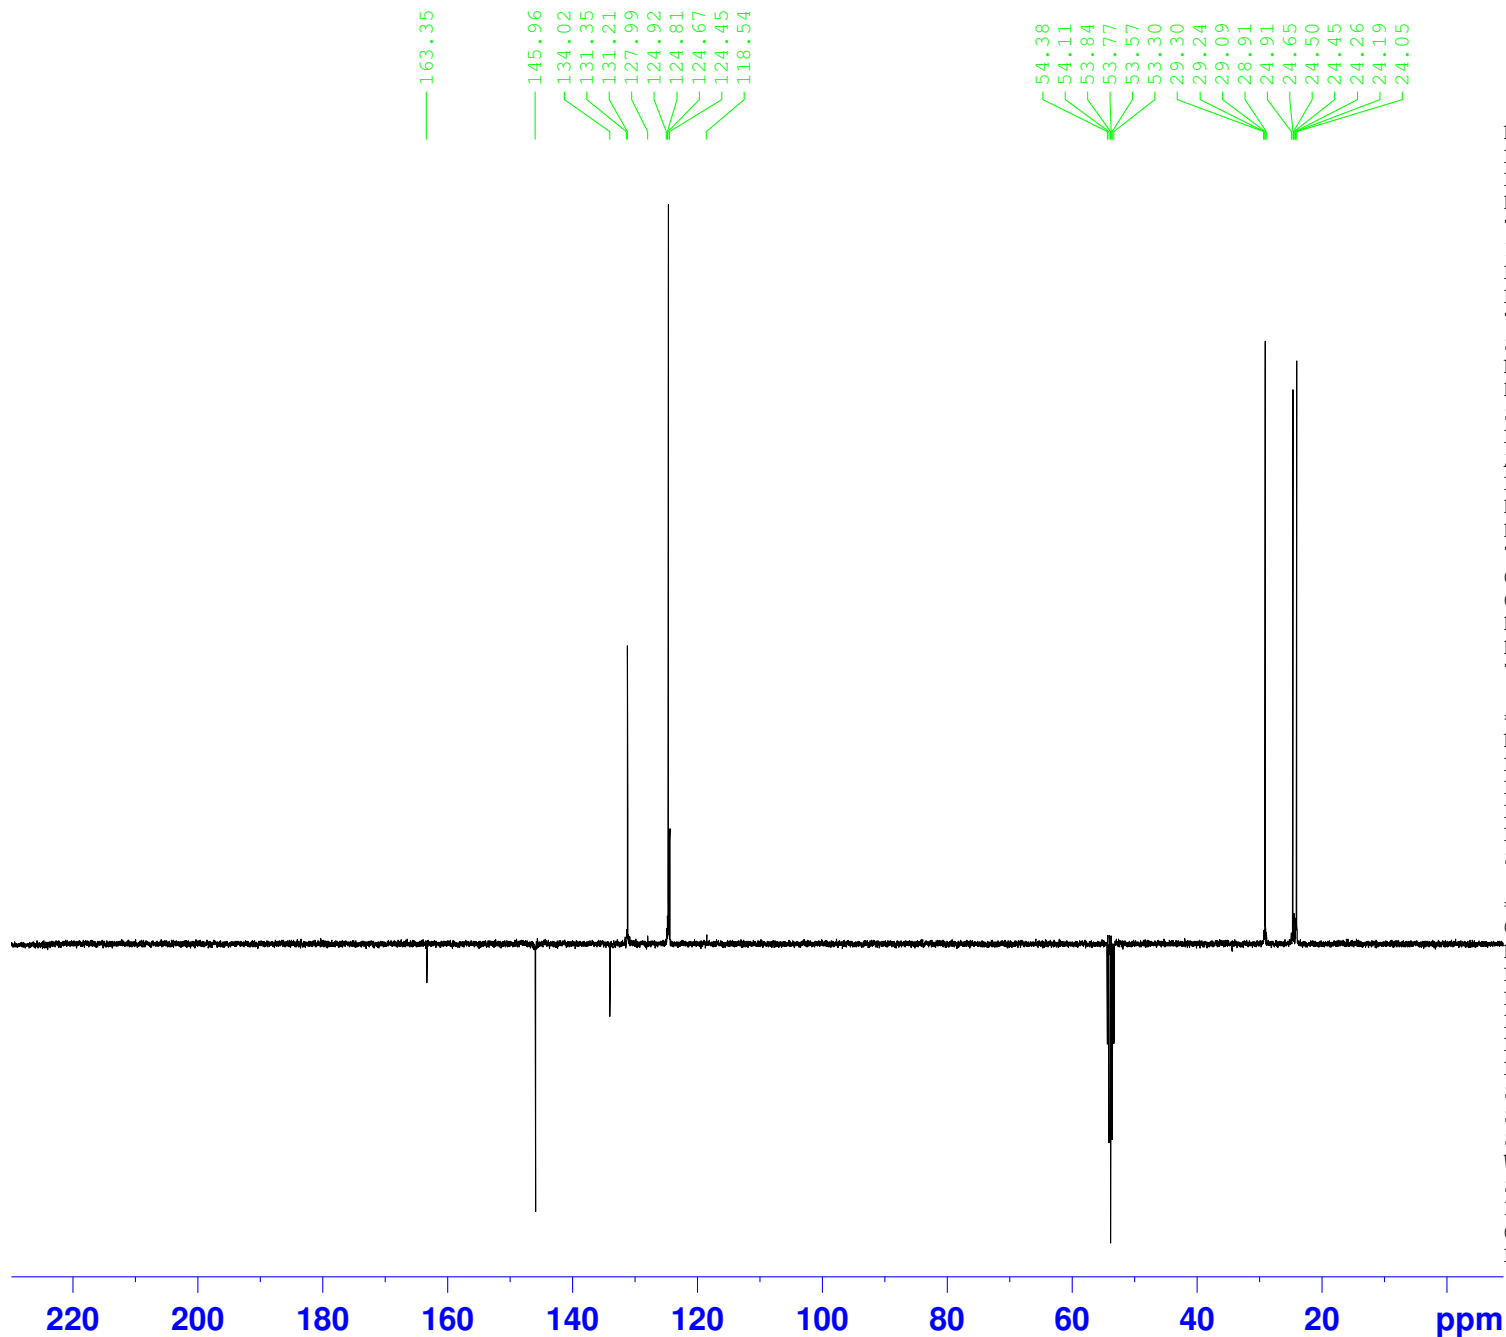

NAME nitz  
 EXPNO 2172  
 PROCNO 1  
 Date\_ 20200903  
 Time 23.20  
 INSTRUM spect  
 PROBHD 5 mm PABBO BB-  
 PULPROG jmod  
 TD 65536  
 SOLVENT CD2Cl2  
 NS 3072  
 DS 4  
 SWH 24038.461 Hz  
 FIDRES 0.366798 Hz  
 AQ 1.3631988 sec  
 RG 2050  
 DW 20.800 usec  
 DE 6.50 usec  
 TE 298.2 K  
 CNST2 145.000000  
 CNST11 1.000000  
 D1 1.5000000 sec  
 D20 0.00689655 sec  
 TD0 1

===== CHANNEL f1 =====  
 NUC1 13C  
 P1 7.50 usec  
 P2 15.00 usec  
 PL1 -1.00 dB  
 PL1W 94.86833191 W  
 SFO1 100.6238354 MHz

===== CHANNEL f2 =====  
 CPDPRG2 waltz16  
 NUC2 1H  
 PCPD2 100.00 usec  
 PL2 -4.00 dB  
 PL12 18.21 dB  
 PL2W 37.85744095 W  
 PL12W 0.22758904 W  
 SFO2 400.1316005 MHz  
 SI 32768  
 SF 100.6127278 MHz  
 WDW EM  
 SSB 0  
 LB 1.00 Hz  
 GB 0  
 PC 1.40
