# Supplementary figures and images for: Synthesis of N-heterocyclic carbene gold(I) complexes
Source: Springer Nature journal article supplement (doi:10.1038/s41596-020-00461-6), 2021-01-27

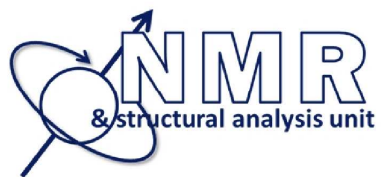

NAME elsi  
EXPNO 1054  
ES-DIGOLD-04  
proton\_icon CD2Cl2 {D:\vd\sp\spn300} spnelsei 17

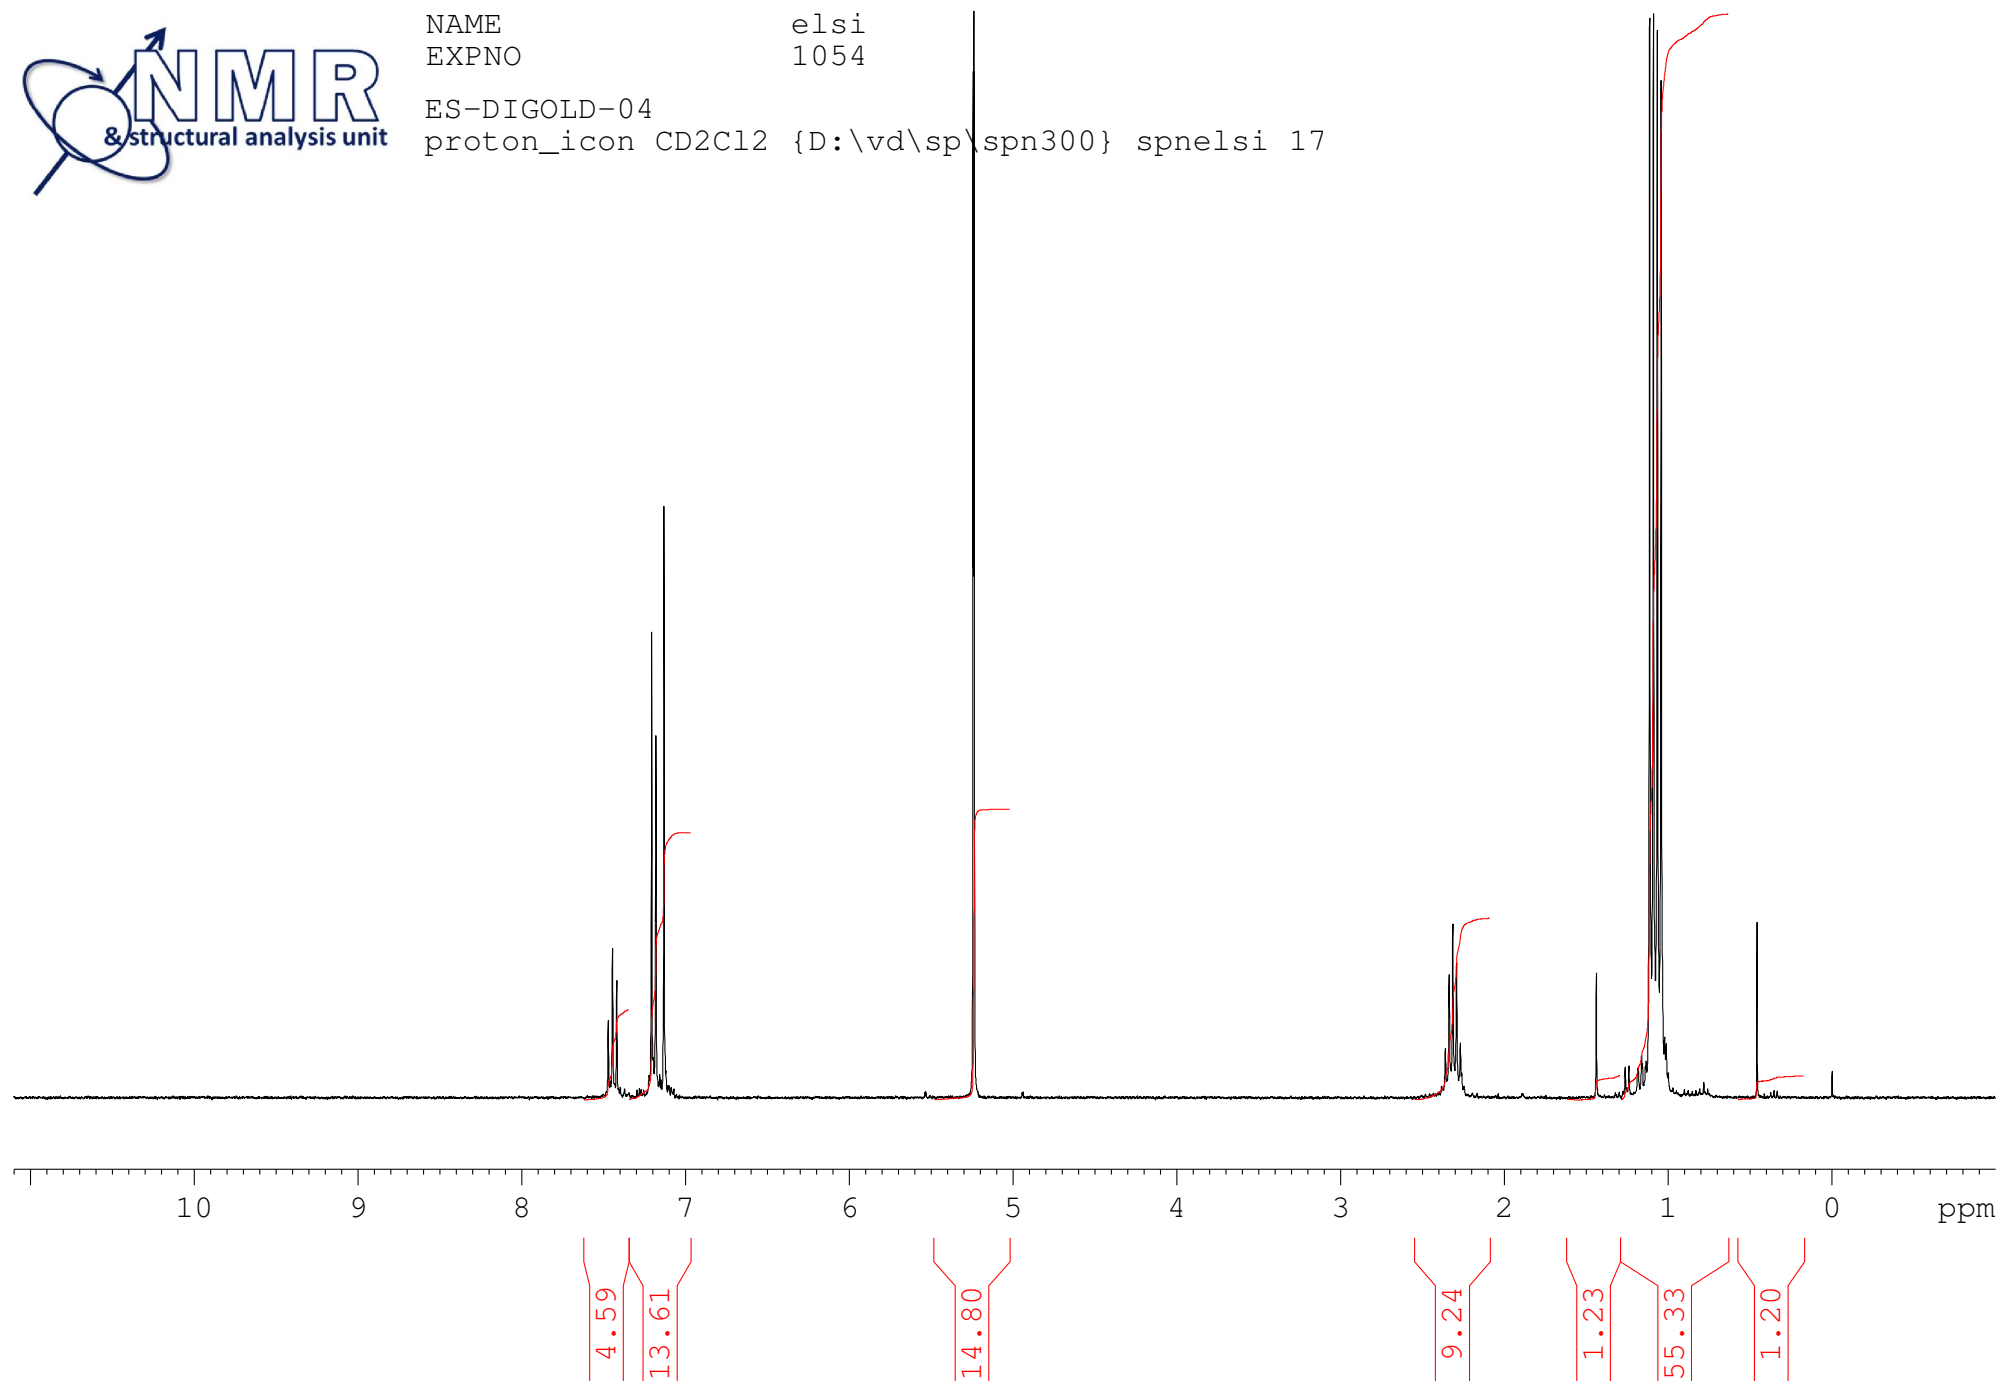

Supplement: MOESM2 [file 41596_2020_461_MOESM2_ESM15.zip]
